# Supplementary material
Source: PubMed Central journal article supplement (PMC4560203)

## **Supplemental Material**

### **Poorly Cited Articles in Peer-Reviewed Cardiovascular Journals: Analysis of 5-year citation rates from 1997-2007**

Isuru Ranasinghe MBChB, MMed, PhD, Abbas Shojaee, MD, Behnood Bikdeli MD, Aakriti Gupta, MD, Ruijun Chen, MD, Joseph S. Ross MD, MHS, Frederick Masoudi MD, MSPH, John A. Spertus MD, MPH, Brahmajee K. Nallamothu, MD, MPH, Harlan M. Krumholz MD, SM

#### **Contents**

- 1. Supplemental Table 1: The number and proportion of poorly cited articles among included cardiovascular journals.**
- 2. Supplemental Figure 1: Yearly Citation in the 10 Years Following Publication for Articles Published in 1997**
- 3. Supplemental Table 2: Post-hoc analysis of 2002-07 citation for journal articles published in 1997**
- 4. Supplemental Figure 2: The proportion of very highly cited articles (> 25 citations) among cardiovascular journals**

**Supplemental Table 1: The number and proportion of poorly cited articles among included cardiovascular journals.** Only journals with at least 20 publications are shown. Journals are ranked by the proportion of poorly cited articles.

| Journal Name                                                     | # Poorly cited articles | # Well cited articles | Total # articles | % Poorly cited |
|------------------------------------------------------------------|-------------------------|-----------------------|------------------|----------------|
| CIRCULATION RESEARCH                                             | 32                      | 3067                  | 3099             | 1.0%           |
| STROKE                                                           | 217                     | 4260                  | 4477             | 4.8%           |
| JOURNAL OF THE AMERICAN COLLEGE OF CARDIOLOGY                    | 262                     | 4921                  | 5183             | 5.1%           |
| HYPERTENSION                                                     | 241                     | 3199                  | 3440             | 7.0%           |
| PROGRESS IN CARDIOVASCULAR DISEASES                              | 7                       | 46                    | 53               | 13.2%          |
| CARDIOVASCULAR DIABETOLOGY                                       | 9                       | 55                    | 64               | 14.1%          |
| CIRCULATION                                                      | 1502                    | 9144                  | 10646            | 14.1%          |
| JOURNAL OF MOLECULAR AND CELLULAR CARDIOLOGY                     | 285                     | 1668                  | 1953             | 14.6%          |
| EUROPEAN HEART JOURNAL                                           | 361                     | 2052                  | 2413             | 15.0%          |
| ATHEROSCLEROSIS                                                  | 475                     | 2658                  | 3133             | 15.2%          |
| JOURNAL OF HYPERTENSION                                          | 401                     | 1991                  | 2392             | 16.8%          |
| HEART FAILURE REVIEWS                                            | 16                      | 70                    | 86               | 18.6%          |
| AMERICAN HEART JOURNAL                                           | 441                     | 1923                  | 2364             | 18.7%          |
| JOURNAL OF VASCULAR SURGERY                                      | 822                     | 2812                  | 3634             | 22.6%          |
| EUROPEAN JOURNAL OF HEART FAILURE                                | 196                     | 664                   | 860              | 22.8%          |
| JOURNAL OF VASCULAR RESEARCH                                     | 134                     | 391                   | 525              | 25.5%          |
| HYPERTENSION RESEARCH                                            | 271                     | 778                   | 1049             | 25.8%          |
| EUROPEAN JOURNAL OF CARDIOVASCULAR PREVENTION AND REHABILITATION | 95                      | 271                   | 366              | 26.0%          |
| AMERICAN JOURNAL OF CARDIOLOGY                                   | 2004                    | 5670                  | 7674             | 26.1%          |
| NATURE CLINICAL PRACTICE CARDIOVASCULAR MEDICINE                 | 18                      | 50                    | 68               | 26.5%          |
| AMERICAN JOURNAL OF HYPERTENSION                                 | 560                     | 1542                  | 2102             | 26.6%          |
| JOURNAL OF CARDIAC FAILURE                                       | 164                     | 437                   | 601              | 27.3%          |
| JOURNAL OF HEART AND LUNG TRANSPLANTATION                        | 561                     | 1386                  | 1947             | 28.8%          |
| DIABETES AND VASCULAR DISEASE RESEARCH                           | 8                       | 19                    | 27               | 29.6%          |
| HEART RHYTHM                                                     | 225                     | 512                   | 737              | 30.5%          |
| JOURNAL OF ENDOVASCULAR THERAPY                                  | 256                     | 547                   | 803              | 31.9%          |
| BMC CARDIOVASCULAR DISORDERS                                     | 47                      | 94                    | 141              | 33.3%          |
| EUROPEAN JOURNAL OF CARDIOVASCULAR NURSING                       | 44                      | 88                    | 132              | 33.3%          |
| BASIC RESEARCH IN CARDIOLOGY                                     | 183                     | 350                   | 533              | 34.3%          |
| SEMINARS IN VASCULAR SURGERY                                     | 33                      | 62                    | 95               | 34.7%          |
| CIRCULATION JOURNAL                                              | 563                     | 1016                  | 1579             | 35.7%          |
| MICROVASCULAR RESEARCH                                           | 249                     | 438                   | 687              | 36.2%          |
| RESUSCITATION                                                    | 546                     | 953                   | 1499             | 36.4%          |
| JOURNAL OF CARDIOVASCULAR ELECTROPHYSIOLOGY                      | 770                     | 1340                  | 2110             | 36.5%          |
| JOURNAL OF THORACIC AND CARDIOVASCULAR SURGERY                   | 1717                    | 2972                  | 4689             | 36.6%          |

|                                                          |      |      |      |       |
|----------------------------------------------------------|------|------|------|-------|
| JOURNAL OF ATHEROSCLEROSIS AND THROMBOSIS                | 101  | 161  | 262  | 38.5% |
| CLINICAL RESEARCH IN CARDIOLOGY                          | 56   | 87   | 143  | 39.2% |
| JOURNAL OF CARDIOVASCULAR MAGNETIC RESONANCE             | 119  | 182  | 301  | 39.5% |
| EUROPEAN JOURNAL OF VASCULAR AND ENDOVASCULAR SURGERY    | 840  | 1266 | 2106 | 39.9% |
| ANNALS OF THORACIC SURGERY                               | 3370 | 4978 | 8348 | 40.4% |
| SEMINARS IN THORACIC AND CARDIOVASCULAR SURGERY          | 167  | 239  | 406  | 41.1% |
| JOURNAL OF CARDIOVASCULAR NURSING                        | 33   | 47   | 80   | 41.3% |
| JOURNAL OF CARDIOVASCULAR PHARMACOLOGY                   | 1131 | 1509 | 2640 | 42.8% |
| THROMBOSIS RESEARCH                                      | 870  | 1138 | 2008 | 43.3% |
| JOURNAL OF NUCLEAR CARDIOLOGY                            | 339  | 415  | 754  | 45.0% |
| EUROPEAN JOURNAL OF CARDIOTHORACIC SURGERY               | 1538 | 1772 | 3310 | 46.5% |
| VASCULAR MEDICINE                                        | 156  | 177  | 333  | 46.8% |
| BLOOD PRESSURE MONITORING                                | 183  | 203  | 386  | 47.4% |
| ANNALS OF VASCULAR SURGERY                               | 485  | 492  | 977  | 49.6% |
| AMERICAN JOURNAL OF CARDIOVASCULAR DRUGS                 | 12   | 12   | 24   | 50.0% |
| NUTRITION METABOLISM AND CARDIOVASCULAR DISEASES         | 248  | 246  | 494  | 50.2% |
| JOURNAL OF CARDIOPULMONARY REHABILITATION AND PREVENTION | 19   | 18   | 37   | 51.4% |
| EUROPACE                                                 | 434  | 404  | 838  | 51.8% |
| REVIEWS IN CARDIOVASCULAR MEDICINE                       | 64   | 59   | 123  | 52.0% |
| HEART AND LUNG JOURNAL OF ACUTE AND CRITICAL CARE        | 285  | 262  | 547  | 52.1% |
| INTERNATIONAL JOURNAL OF CARDIOLOGY                      | 1966 | 1759 | 3725 | 52.8% |
| JOURNAL OF CARDIOVASCULAR PHARMACOLOGY AND THERAPEUTICS  | 158  | 134  | 292  | 54.1% |
| CORONARY ARTERY DISEASE                                  | 400  | 329  | 729  | 54.9% |
| JOURNAL OF HEART VALVE DISEASE                           | 694  | 556  | 1250 | 55.5% |
| PACING AND CLINICAL ELECTROPHYSIOLOGY PACE               | 1583 | 1265 | 2848 | 55.6% |
| BLOOD PRESSURE                                           | 279  | 220  | 499  | 55.9% |
| JOURNAL OF THE AMERICAN SOCIETY OF ECHOCARDIOGRAPHY      | 1241 | 962  | 2203 | 56.3% |
| HEART                                                    | 2541 | 1888 | 4429 | 57.4% |
| CARDIOLOGY                                               | 477  | 350  | 827  | 57.7% |
| VASCULAR AND ENDOVASCULAR SURGERY                        | 199  | 145  | 344  | 57.8% |
| EUROPEAN JOURNAL OF ECHOCARDIOGRAPHY                     | 274  | 198  | 472  | 58.1% |
| VASCULAR HEALTH AND RISK MANAGEMENT                      | 18   | 13   | 31   | 58.1% |
| PREVENTIVE CARDIOLOGY                                    | 39   | 28   | 67   | 58.2% |
| INTERNATIONAL HEART JOURNAL                              | 168  | 117  | 285  | 58.9% |
| HEART AND VESSELS                                        | 323  | 222  | 545  | 59.3% |
| JOURNAL OF THROMBOSIS AND THROMBOLYSIS                   | 316  | 212  | 528  | 59.8% |
| CONGESTIVE HEART FAILURE                                 | 89   | 57   | 146  | 61.0% |
| VASCULAR                                                 | 112  | 69   | 181  | 61.9% |
| JOURNAL OF CARDIOTHORACIC SURGERY                        | 54   | 33   | 87   | 62.1% |
| JOURNAL OF CARDIOTHORACIC AND VASCULAR ANESTHESIA        | 865  | 526  | 1391 | 62.2% |
| JOURNAL OF THE AMERICAN SOCIETY OF HYPERTENSION          | 19   | 11   | 30   | 63.3% |
| INTERNATIONAL JOURNAL OF CARDIOVASCULAR IMAGING          | 298  | 169  | 467  | 63.8% |
| INTERNATIONAL ANGIOLOGY                                  | 350  | 196  | 546  | 64.1% |

|                                                           |      |     |      |       |
|-----------------------------------------------------------|------|-----|------|-------|
| ANGIOLOGY                                                 | 831  | 465 | 1296 | 64.1% |
| CANADIAN JOURNAL OF CARDIOLOGY                            | 742  | 414 | 1156 | 64.2% |
| JOURNAL OF INTERVENTIONAL CARDIAC ELECTROPHYSIOLOGY       | 383  | 207 | 590  | 64.9% |
| JOURNAL OF CARDIOVASCULAR NURSING                         | 49   | 25  | 74   | 66.2% |
| PERFUSION                                                 | 441  | 224 | 665  | 66.3% |
| ACTA MYOLOGICA                                            | 14   | 7   | 21   | 66.7% |
| CURRENT OPINION IN CARDIOLOGY                             | 49   | 24  | 73   | 67.1% |
| PEDIATRIC CARDIOLOGY                                      | 749  | 366 | 1115 | 67.2% |
| CLINICAL CARDIOLOGY                                       | 923  | 450 | 1373 | 67.2% |
| CARDIOLOGY IN REVIEW                                      | 95   | 44  | 139  | 68.3% |
| CURRENT CARDIOLOGY REPORTS                                | 151  | 69  | 220  | 68.6% |
| JOURNAL OF ELECTROCARDIOLOGY                              | 458  | 206 | 664  | 69.0% |
| THORACIC AND CARDIOVASCULAR SURGEON                       | 687  | 295 | 982  | 70.0% |
| SCANDINAVIAN CARDIOVASCULAR JOURNAL                       | 453  | 192 | 645  | 70.2% |
| ECHOCARDIOGRAPHY                                          | 924  | 390 | 1314 | 70.3% |
| ANNALS OF NONINVASIVE ELECTROCARDIOLOGY                   | 331  | 139 | 470  | 70.4% |
| JOURNAL OF INTERVENTIONAL CARDIOLOGY                      | 366  | 151 | 517  | 70.8% |
| JAPANESE CIRCULATION JOURNAL                              | 645  | 260 | 905  | 71.3% |
| HERZ                                                      | 422  | 169 | 591  | 71.4% |
| JOURNAL OF INVASIVE CARDIOLOGY                            | 1055 | 413 | 1468 | 71.9% |
| EXPERT REVIEW OF CARDIOVASCULAR THERAPY                   | 17   | 6   | 23   | 73.9% |
| JOURNAL OF CARDIAC SURGERY                                | 561  | 197 | 758  | 74.0% |
| ACUTE CARDIAC CARE                                        | 43   | 15  | 58   | 74.1% |
| REVISTA ESPANOLA DE CARDIOLOGIA                           | 1195 | 416 | 1611 | 74.2% |
| CONGENITAL HEART DISEASE                                  | 70   | 24  | 94   | 74.5% |
| TEXAS HEART INSTITUTE JOURNAL                             | 581  | 199 | 780  | 74.5% |
| INTERNATIONAL JOURNAL OF STROKE                           | 41   | 14  | 55   | 74.5% |
| PEDIATRIC CARDIAC SURGERY ANNUAL                          | 51   | 17  | 68   | 75.0% |
| CARDIOLOGY IN THE YOUNG                                   | 861  | 282 | 1143 | 75.3% |
| CURRENT HYPERTENSION REPORTS                              | 77   | 25  | 102  | 75.5% |
| JOURNAL OF CARDIOVASCULAR MEDICINE                        | 208  | 67  | 275  | 75.6% |
| JOURNAL OF CARDIOVASCULAR COMPUTED TOMOGRAPHY             | 19   | 6   | 25   | 76.0% |
| JOURNAL OF CARDIOVASCULAR SURGERY                         | 1008 | 308 | 1316 | 76.6% |
| JOURNAL OF CLINICAL LIPIDOLOGY                            | 20   | 6   | 26   | 76.9% |
| HEART LUNG CIRCULATION                                    | 220  | 65  | 285  | 77.2% |
| ACTA CARDIOLOGICA                                         | 559  | 155 | 714  | 78.3% |
| HEART SURGERY FORUM                                       | 402  | 111 | 513  | 78.4% |
| PERSPECTIVES IN VASCULAR SURGERY AND ENDOVASCULAR THERAPY | 70   | 19  | 89   | 78.7% |
| PHLEBOLOGY                                                | 216  | 51  | 267  | 80.9% |
| EVIDENCE AND POLICY                                       | 35   | 8   | 43   | 81.4% |
| INTERACTIVE CARDIOVASCULAR AND THORACIC SURGERY           | 561  | 123 | 684  | 82.0% |
| ANNALS OF THORACIC AND CARDIOVASCULAR SURGERY             | 68   | 14  | 82   | 82.9% |
| GENERAL THORACIC AND CARDIOVASCULAR SURGERY               | 91   | 17  | 108  | 84.3% |
| HEART SURGERY FORUM                                       | 443  | 78  | 521  | 85.0% |

|                                                                              |      |     |      |       |
|------------------------------------------------------------------------------|------|-----|------|-------|
| BRAZILIAN JOURNAL OF CARDIOVASCULAR SURGERY                                  | 113  | 17  | 130  | 86.9% |
| PHLEBOLOGIE                                                                  | 185  | 27  | 212  | 87.3% |
| ANNALS OF THORACIC MEDICINE                                                  | 28   | 4   | 32   | 87.5% |
| AMERICAN JOURNAL OF GERIATRIC CARDIOLOGY                                     | 94   | 13  | 107  | 87.9% |
| JOURNAL DES MALADIES VASCULAIRES                                             | 283  | 37  | 320  | 88.4% |
| INDIAN HEART JOURNAL                                                         | 738  | 93  | 831  | 88.8% |
| EXPERIMENTAL AND CLINICAL CARDIOLOGY                                         | 123  | 15  | 138  | 89.1% |
| JOURNAL OF INVASIVE CARDIOLOGY                                               | 41   | 5   | 46   | 89.1% |
| ARQUIVOS BRASILEIROS DE CARDIOLOGIA                                          | 1713 | 185 | 1898 | 90.3% |
| JOURNAL OF CARDIOLOGY                                                        | 908  | 97  | 1005 | 90.3% |
| NETHERLANDS HEART JOURNAL                                                    | 175  | 18  | 193  | 90.7% |
| HELLENIC JOURNAL OF CARDIOLOGY                                               | 281  | 27  | 308  | 91.2% |
| PROGRESS IN PEDIATRIC CARDIOLOGY                                             | 90   | 8   | 98   | 91.8% |
| BRITISH JOURNAL OF DIABETES AND VASCULAR DISEASE                             | 172  | 15  | 187  | 92.0% |
| JOURNAL OF HEART VALVE DISEASE                                               | 23   | 2   | 25   | 92.0% |
| ANADOLU KARDIYOLOJI DERGISI                                                  | 427  | 29  | 456  | 93.6% |
| CARDIOLOGY JOURNAL                                                           | 48   | 3   | 51   | 94.1% |
| KARDIOLOGIA POLSKA                                                           | 1303 | 75  | 1378 | 94.6% |
| REVISTA PORTUGUESA DE CARDIOLOGIA                                            | 854  | 48  | 902  | 94.7% |
| MINERVA CARDIOANGIOLOGICA                                                    | 512  | 28  | 540  | 94.8% |
| ASIAN CARDIOVASCULAR AND THORACIC ANNALS                                     | 953  | 52  | 1005 | 94.8% |
| OPERATIVE TECHNIQUES IN THORACIC AND CARDIOVASCULAR SURGERY                  | 166  | 9   | 175  | 94.9% |
| INNOVATIONS TECHNOLOGY AND TECHNIQUES IN CARDIOTHORACIC AND VASCULAR SURGERY | 38   | 2   | 40   | 95.0% |
| GEFASSCHIRURGIE                                                              | 325  | 17  | 342  | 95.0% |
| GIORNALE ITALIANO DI CARDIOLOGIA                                             | 490  | 25  | 515  | 95.1% |
| ANNALES DE CARDIOLOGIE ET D'ANGIOLOGIE                                       | 403  | 20  | 423  | 95.3% |
| JORNAL VASCULAR BRASILEIRO                                                   | 144  | 7   | 151  | 95.4% |
| BRITISH JOURNAL OF CARDIOLOGY                                                | 419  | 20  | 439  | 95.4% |
| HERZSCHRITTMACHERTHERAPIE UND ELEKTROPHYSIOLOGIE                             | 130  | 6   | 136  | 95.6% |
| KOREAN CIRCULATION JOURNAL                                                   | 192  | 8   | 200  | 96.0% |
| JOURNAL FOR VASCULAR ULTRASOUND                                              | 25   | 1   | 26   | 96.2% |
| JOURNAL OF CLINICAL AND BASIC CARDIOLOGY                                     | 104  | 4   | 108  | 96.3% |
| INTERNATIONAL JOURNAL OF ANGIOLOGY                                           | 443  | 15  | 458  | 96.7% |
| JOURNAL FUR KARDIOLOGIE                                                      | 243  | 8   | 251  | 96.8% |
| COR ET VASA                                                                  | 98   | 3   | 101  | 97.0% |
| VASOMED                                                                      | 80   | 2   | 82   | 97.6% |
| ARCHIVOS DE CARDIOLOGIA DE MEXICO                                            | 334  | 8   | 342  | 97.7% |
| CURRENT CARDIOVASCULAR RISK REPORTS                                          | 56   | 1   | 57   | 98.2% |
| TURK KARDIYOLOJI DERNEGI ARSIVI                                              | 308  | 4   | 312  | 98.7% |
| COMPUTERS IN CARDIOLOGY                                                      | 179  | 2   | 181  | 98.9% |
| APPLIED CARDIOPULMONARY PATHOPHYSIOLOGY                                      | 114  | 1   | 115  | 99.1% |
| NADCISNIENIE TETNICZE                                                        | 151  | 1   | 152  | 99.3% |
| INDIAN JOURNAL OF THORACIC AND CARDIOVASCULAR SURGERY                        | 248  | 1   | 249  | 99.6% |

|                                                          |      |   |      |        |
|----------------------------------------------------------|------|---|------|--------|
| ACTA CARDIOLOGICA SINICA                                 | 311  | 1 | 312  | 99.7%  |
| ZEITSCHRIFT FUR HERZ THORAX UND GEFASSCHIRURGIE          | 386  | 1 | 387  | 99.7%  |
| CARDIOLOGY REVIEW                                        | 627  | 1 | 628  | 99.8%  |
| KARDIOLOGIYA                                             | 1342 | 2 | 1344 | 99.9%  |
| RESPIRATION AND CIRCULATION                              | 906  | 1 | 907  | 99.9%  |
| EJVES EXTRA                                              | 414  | 0 | 414  | 100.0% |
| POLSKI PRZEGLAD KARDIOLOGICZNY                           | 342  | 0 | 342  | 100.0% |
| SANG THROMBOSE VAISSEaux                                 | 246  | 0 | 246  | 100.0% |
| ANGEIOLOGIE                                              | 76   | 0 | 76   | 100.0% |
| FUTURE CARDIOLOGY                                        | 46   | 0 | 46   | 100.0% |
| CLINICAL AND EXPERIMENTAL MEDICAL LETTERS                | 35   | 0 | 35   | 100.0% |
| JOURNAL OF TEHRAN UNIVERSITY HEART CENTER                | 33   | 0 | 33   | 100.0% |
| JOURNAL OF GERIATRIC CARDIOLOGY                          | 30   | 0 | 30   | 100.0% |
| DIALOGUES IN CARDIOVASCULAR MEDICINE                     | 28   | 0 | 28   | 100.0% |
| ITALIAN JOURNAL OF VASCULAR AND ENDOVASCULAR SURGERY     | 25   | 0 | 25   | 100.0% |
| CLINICA E INVESTIGACION EN ARTERIOSCLEROSIS              | 24   | 0 | 24   | 100.0% |
| ANALES DE PATOLOGIA VASCULAR                             | 20   | 0 | 20   | 100.0% |
| ARCHIVES DES MALADIES DU COEUR ET DES VAISSEaux PRATIQUE | 20   | 0 | 20   | 100.0% |
| HART BULLETIN                                            | 20   | 0 | 20   | 100.0% |
| HEART AND METABOLISM                                     | 20   | 0 | 20   | 100.0% |
| VASCULAR DISEASE MANAGEMENT                              | 20   | 0 | 20   | 100.0% |

**Supplemental Figure 1: Yearly Citation in the 10 Years Following Publication for Articles Published in 1997**

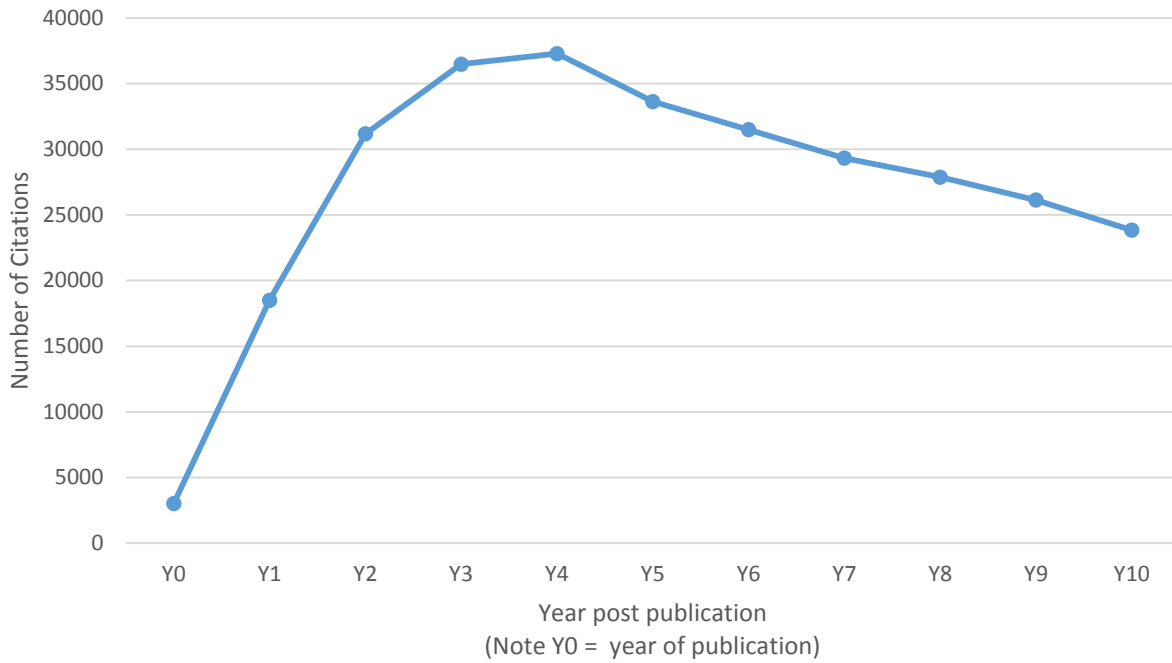

**Supplemental Table 2: Post-hoc analysis of 2002-07 citation for journal articles published in 1997. How well were articles that were poorly cited within the first 5 years cited in the subsequent 5 years?**

|     | Poorly cited 1997-2002 | Poorly cited 2003-2007 |                 |
|-----|------------------------|------------------------|-----------------|
|     |                        | Yes                    | No              |
| Yes |                        | 5903<br>(91%)          | 572<br>(8.8%)   |
| No  |                        | 1424<br>(23.4%)        | 4668<br>(76.6%) |

**Supplemental Figure 2: The proportion of very highly cited articles (> 25 citations) among cardiovascular journals.** In this figure, we rank the 182 cardiovascular journals by the proportion of poorly cited articles – journal 1 (left) on the x-axis has the least proportion of poorly cited article content and journal 182 (right) has the highest proportion of poorly cited article content.

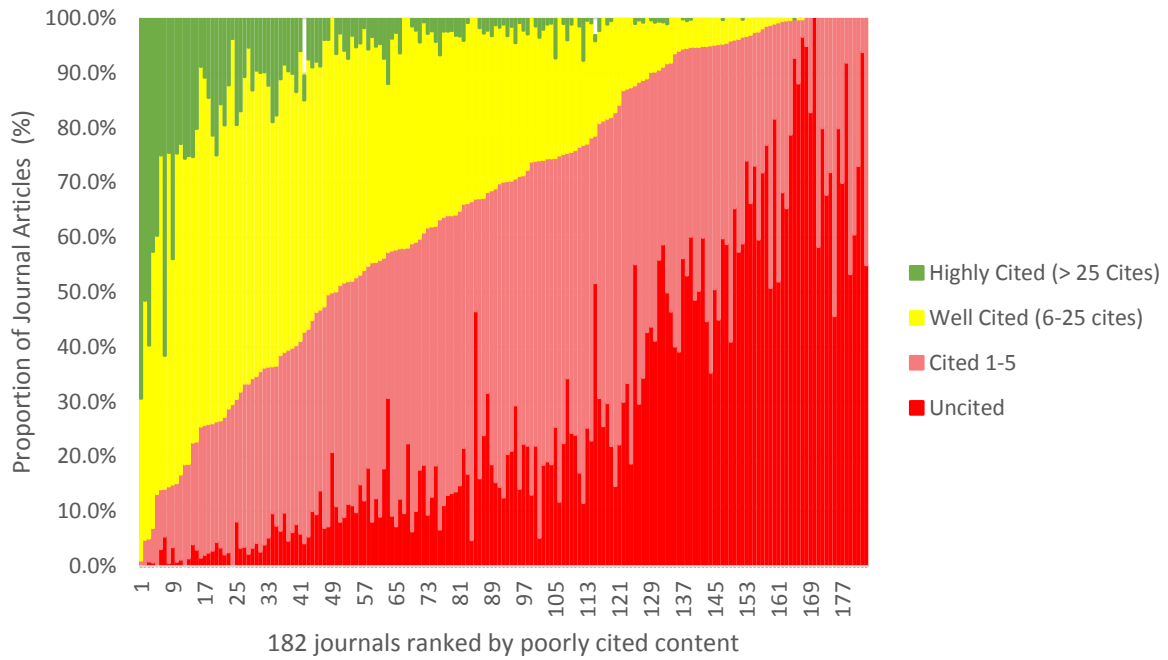

Supplement: NIHMS677087-supplement-2.pdf [file NIHMS677087-supplement-2.pdf]
